# Supplementary material
Source: PubMed Central journal article supplement (PMC6731671)
Supplement: pnas.1907447116.sapp.pdf [file pnas.1907447116.sapp.pdf]

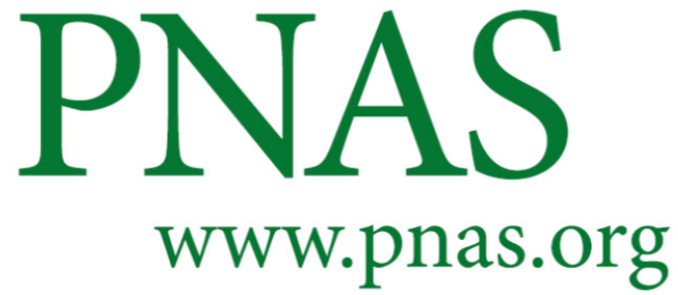

Supplementary Information for

Human cytomegalovirus glycoprotein B variants affect viral entry, cell fusion, and genome stability

Jiajia Tang<sup>1</sup>, Giada Frascaroli<sup>1</sup>, Robert J. Lebbink<sup>2</sup>, Eleonore Ostermann<sup>1</sup>, Wolfram Brune<sup>1,\*</sup>

Corresponding author: Wolfram Brune

Email: [wolfram.brune@leibniz-hpi.de](mailto:wolfram.brune@leibniz-hpi.de)

**This PDF file includes:**

Figures S1 to S5

Supplementary Information

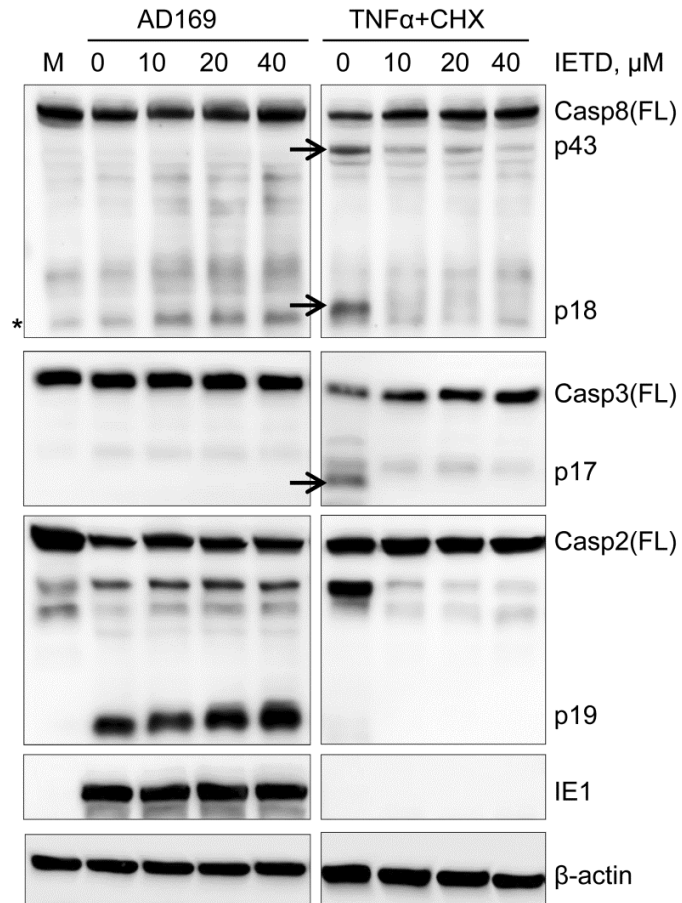

**Fig. S1. Caspase-2 activation upon HCMV AD169 infection is independent of caspase-8.** MRC-5 fibroblasts were pre-treated with caspase-8 inhibitor (Z-IETD-FMK) at the indicated concentrations. After 1 h, cells were either infected with AD169 (MOI 5) for 24 h or treated with 50 ng/ml TNF $\alpha$  + 50  $\mu$ g/ml CHX for 9 h. Activation of caspase-8, caspase-3, and caspase-2 was analyzed by immunoblot analysis. IE1 and  $\beta$ -actin were used as infection and loading controls, respectively. Arrows show the active subunit of caspase-8 and caspase-3, \* non-specific band.

**A**

|              | Main function(s)                                                          | Amino acid differences between other strains and AD169 |
|--------------|---------------------------------------------------------------------------|--------------------------------------------------------|
| <i>UL32</i>  | Restricts HCMV gene expression to G0/G1                                   | A85V                                                   |
| <i>UL36</i>  | vICA, suppresses extrinsic apoptosis                                      | C131R                                                  |
| <i>UL69</i>  | Induces cells to accumulate in G1                                         | Y61H                                                   |
| <i>UL76</i>  | Induces DNA damage response                                               | A211T, G234D, V308F, R319C                             |
| <i>UL82</i>  | Stimulates quiescent cell to enter the cell cycle and arrests at G1/S     | R464P                                                  |
| <i>UL97</i>  | Disrupts APC, promotes G2/M progression, Releases E2F from Rb-E2F complex | D68N, V244I                                            |
| <i>UL117</i> | Inhibits cellular DNA synthesis                                           | V159A                                                  |

**B**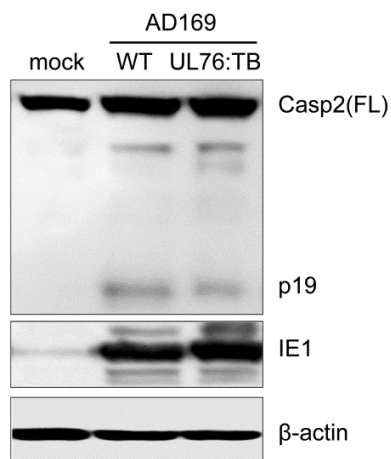**C**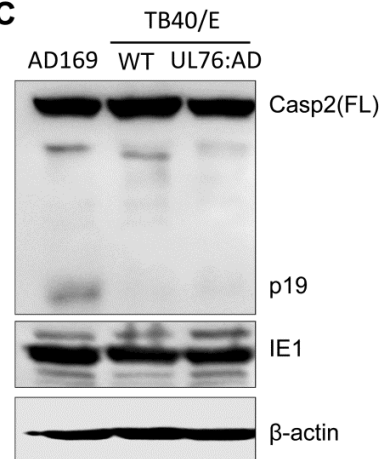

**Fig. S2. Analysis of candidate genes.** (A) Viral genes known to be involved in apoptosis, cell cycle regulation, or DDR were considered as candidate genes involved in caspase-2 activation if an AD169-specific variant existed. Candidate gene *UL76* was mutated at target region in both, AD169 (B) and TB40/E (C). Their ability to activate caspase-2 was determined by immunoblot analysis.

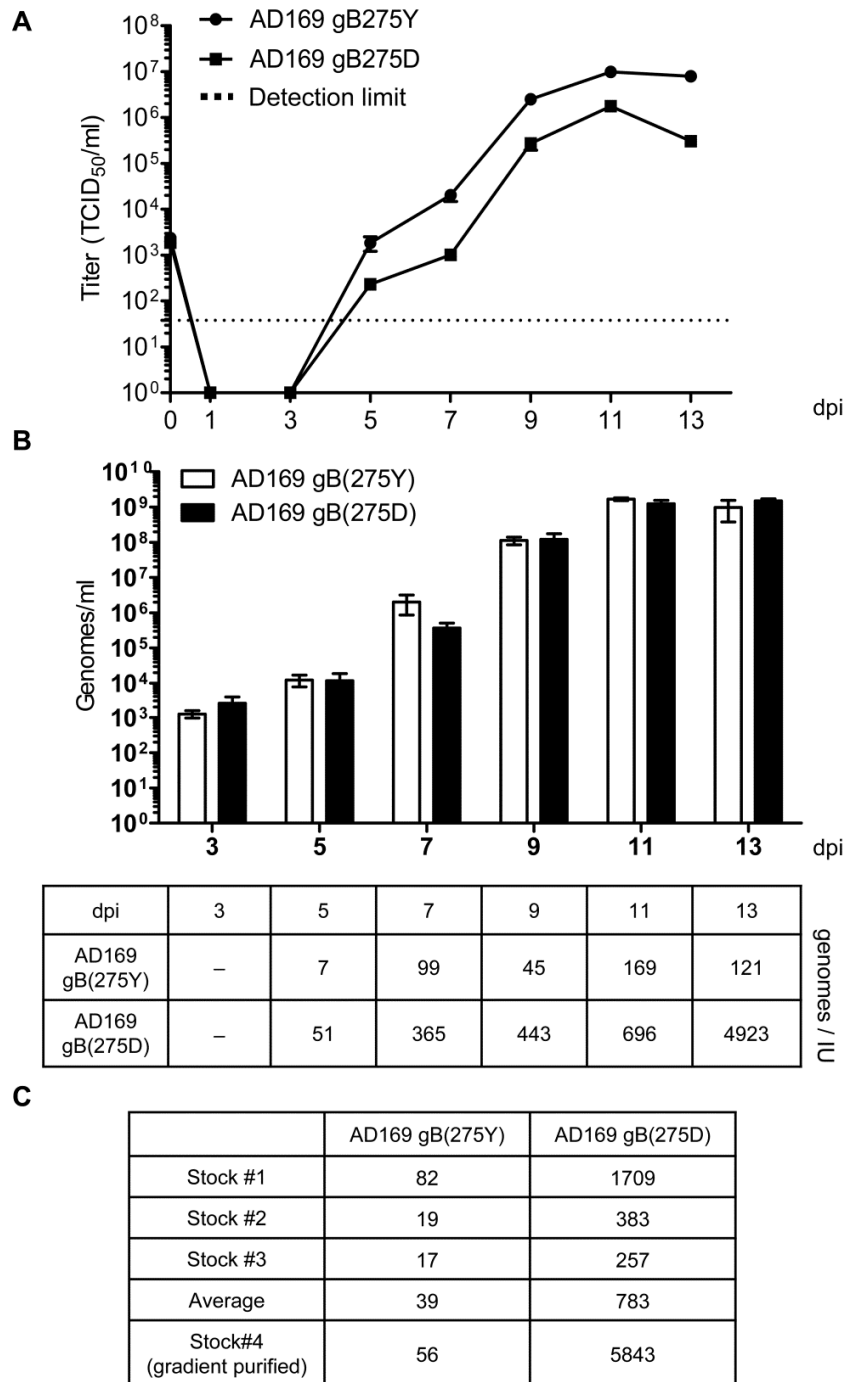

**Fig. S3. Infectivity of viral particles.** (A, B) To determine replication kinetics, MRC-5 cells were infected with AD169 gB(275Y) or AD169 gB(275D) at an MOI of 0.03 TCID<sub>50</sub>/cell. Release of infectious virus into the supernatant was determined by titration (A). In parallel, viral genomes in the supernatant were quantified by qPCR (B). Means ± SEM of triplicates are shown. Infectivity of viral particles was calculated as viral genomes per infectious unit (IU). (C) For each virus, genomes/IU ratios of 3 sucrose cushion-purified viral stocks and one glycerol-tartrate gradient-purified stock were determined by titration and qPCR. The average values of stocks #1 to 3 are shown.

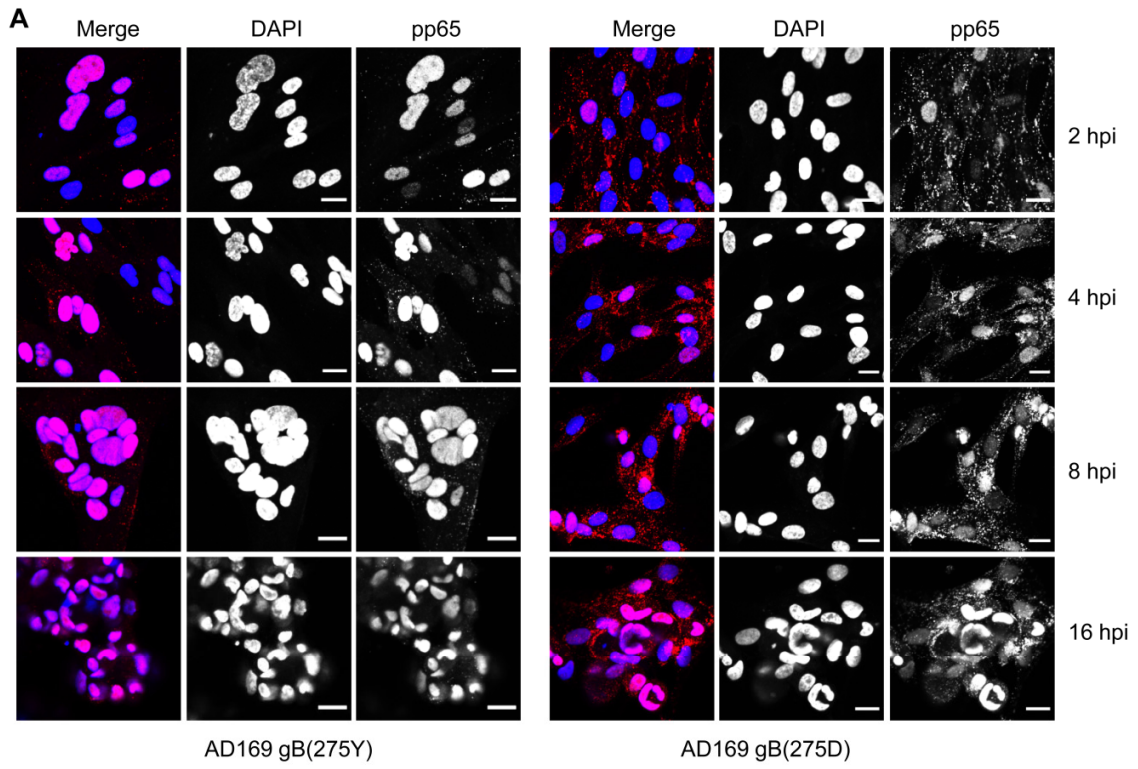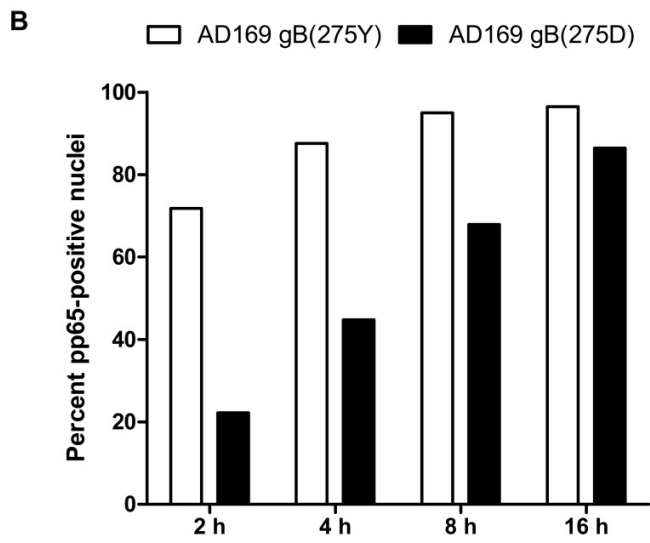

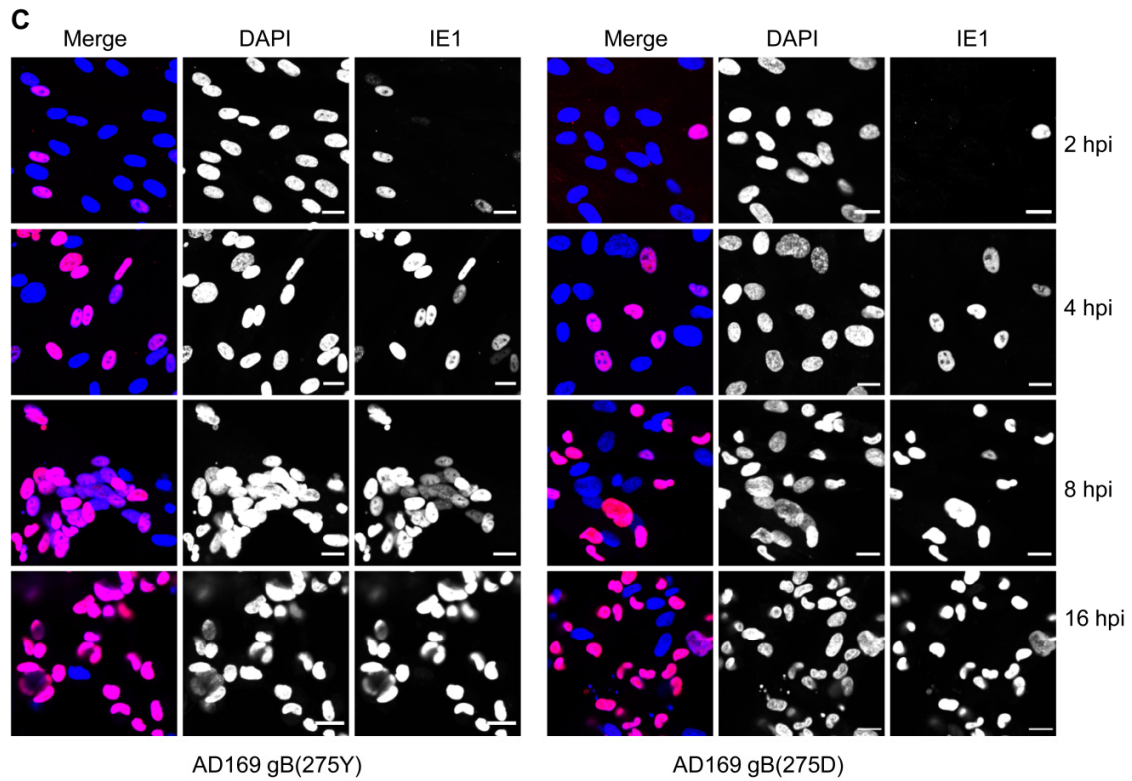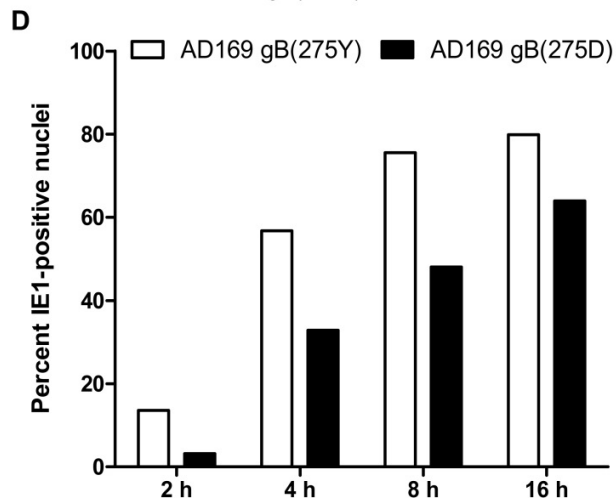

**Fig. S4. Kinetics of pp65 nuclear translocation and IE1 expression.** (A, C) MRC-5 fibroblasts were infected with AD169 gB(275Y) and gB(275D) at an MOI of 3. At the indicated times, cells were fixed and the viral tegument protein pp65 (A) and the viral IE1 protein (C) were detected by indirect immunofluorescence. Nuclei were counterstained with DAPI. Bar, 20  $\mu$ m. (B, D) At least 300 nuclei were evaluated, and the percentages of pp65-positive (B) and IE1-positive (D) nuclei are shown.

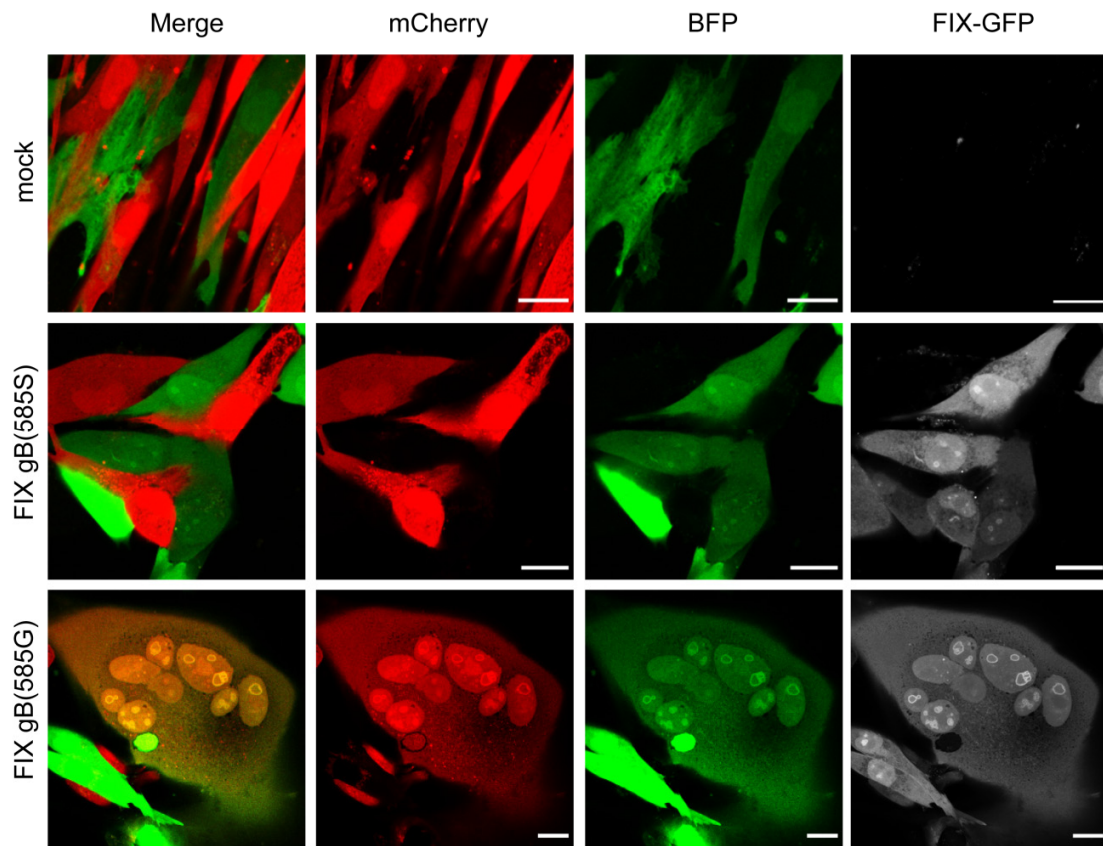

**Fig S5. FIX gB(585G) promotes cells fusion.** MRC-5 cells were transduced with retroviral vectors expressing BFP or mCherry, mixed equally, and infected with FIX-GFP gB(585S) or FIX-GFP gB(585G) (MOI 3). Cells were fixed 48 hpi and images were acquired using a Nikon A1+ LSM confocal microscope. For better visualization, BFP fluorescence is shown in green. Bar, 20  $\mu$ m.
